# Supplementary material for: Glycopolymer-based multifunctional antibacterial hydrogel dressings for accelerating cutaneous wound healing
Source: Royal Society of Chemistry journal article supplement (doi:10.1039/d3tb00908d), 2023-01-01
Supplement: d3tb00908d6.pdf [file d3tb00908d6.pdf]

## Supporting Information

### **Glycopolymer-Based Multifunctional Antibacterial Hydrogel**

#### **Dressings for Accelerating Cutaneous Wound Healing**

*Qiuli Cheng,<sup>a,Ω</sup> Zhihao Wang,<sup>a,b,Ω</sup> Shumin Hu,<sup>a,b</sup> Yi-Yang Peng,<sup>c</sup> Rui Zhu,<sup>a,b,Ω</sup> Leitao Zhang,<sup>a</sup> Junbo Li,<sup>a,\*</sup> Ravin Narain,<sup>c,\*</sup>*

<sup>a</sup> School of Materials Science and Engineering, Henan University of Science and Technology, Luoyang 471023, P. R. China.

<sup>b</sup> School of Chemistry & Chemical Engineering, Henan University of Science and Technology, Luoyang 471023, P. R. China.

<sup>c</sup> Department of Chemical and Material Engineering, University of Alberta, Edmonton, Alberta T6G 1H9, Canada.

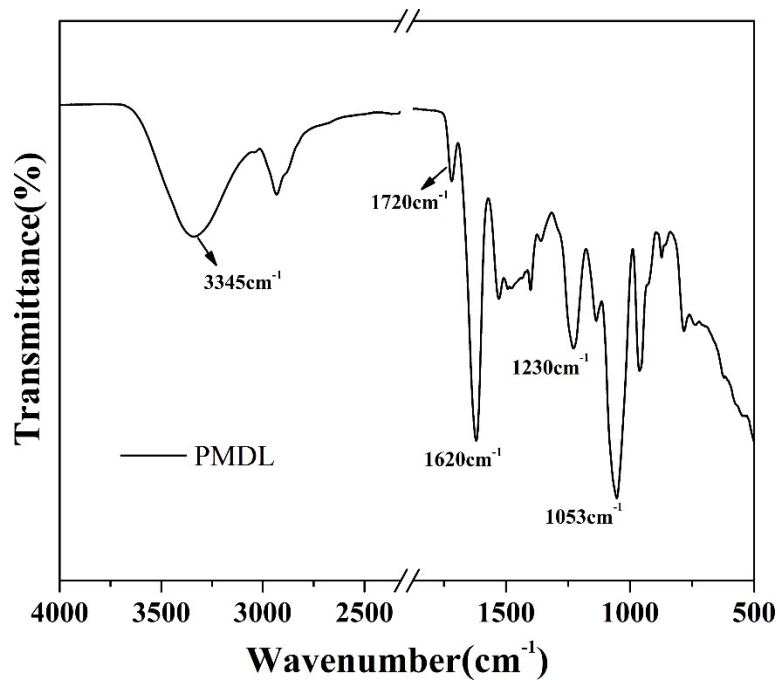

Figure S1. IR spectrum of poly[(2-methacryloyloxyethyl phosphorylcholine)-*co*-(N, N-dimethylacrylamide)-*co*-(2-lactobionamidoethyl methacrylamide)] (PMDL).

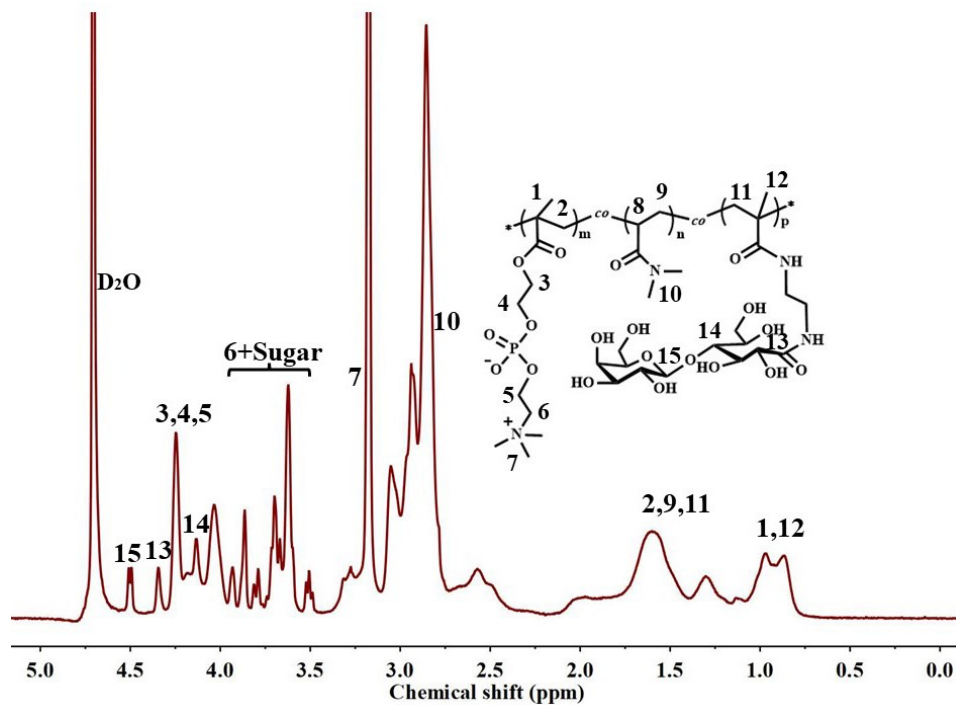

Figure S2.  $^1\text{H}$  NMR spectrum of copolymer PMDL.

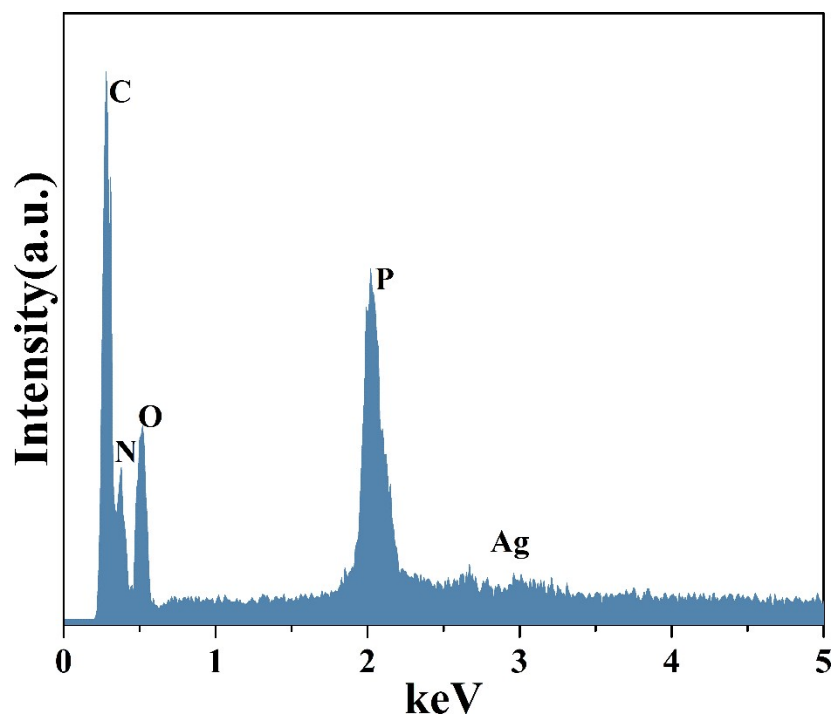

Figure S3. EDS spectrum of PMDL-12%/Borax/Ag NPs hydrogel
